# Supplementary material
Source: publisher figshare collection journal article supplement (https://karger.figshare.com/ndownloader/files/29246115)
Supplement: Supplementary file 1 [file 29246115]

**Supplement 2. Study Search Strategy**

**Ovid MEDLINE**

1. exp Infant/
2. (infant* or neonate* or newborn*).ti,ab,kf.
3. 1 or 2
4. (preterm or premature or low birth weight or low birthweight or VLBW or ELBW).ti,ab,kf.
5. "<1500g".ti,ab,kf.
6. (less than or under).ti,ab,kf.
7. ("1500" or "1500g").ti,ab,kf.
8. (g or grams).ti,ab,kf.
9. 6 and 7 and 8
10. 4 or 5 or 9
11. 3 and 10
12. exp Infant, Premature/
13. exp Infant, Low Birth Weight/
14. 11 or 12 or 13
15. exp Hyperglycemia/
16. exp Blood Glucose/
17. exp Insulin/
18. (hyperglycemia or hyperglycemic or hyperglycaemia or hyperglycaemic).ti,ab,kf.
19. (((glycaemic or glycemic) adj control) or glucose control).ti,ab,kf.
20. blood glucose.ti,ab,kf.
21. 15 or 16 or 17 or 18 or 19 or 20
22. 14 and 21

**EMBASE (via Ovid)**

1. exp Infant/
2. (infant* or neonate* or newborn*).ti,ab.
3. 1 or 2
4. (preterm or premature or low birth weight or low birthweight or VLBW or ELBW).ti,ab.
5. "<1500g".ti,ab.
6. (less than or under).ti,ab.
7. ("1500" or "1500g").ti,ab.
8. (g or grams).ti,ab.
9. 6 and 7 and 8
10. 4 or 5 or 9
11. 3 and 10
12. exp prematurity/
13. exp low birth weight/
14. 11 or 12 or 13
15. exp hyperglycemia/
16. exp glucose blood level/
17. exp insulin/
18. (hyperglycemia or hyperglycemic or hyperglycaemia or hyperglycaemic).ti,ab.
19. (((glycaemic or glycemic) adj control) or glucose control).ti,ab.
20. blood glucose.ti,ab.
21. 15 or 16 or 17 or 18 or 19 or 20
22. 14 and 21

**Cochrane Library**

1. MeSH descriptor: [Infant] explode all trees
2. (infant* or neonate* or newborn*):ti,ab,kw
3. #1 OR #2
4. (preterm or premature or low birth weight or low birthweight or VLBW or ELBW):ti,ab,kw
5. ("<1500g"):ti,ab,kw
6. (less than or under):ti,ab,kw
7. 1500" or "1500g"):ti,ab,kw
8. (g or grams):ti,ab,kw
9. #6 and #7 and #8
10. #4 or #5 or #9
11. #3 and #10
12. MeSH descriptor: [Infant, Premature] explode all trees
13. MeSH descriptor: [Infant, Low Birth Weight] explode all trees
14. #11 or #12 or #13
15. MeSH descriptor: [Hyperglycemia] explode all trees
16. MeSH descriptor: [Blood Glucose] explode all trees
17. MeSH descriptor: [Insulin] explode all trees
18. (hyperglycemia or hyperglycemic or hyperglycaemia or hyperglycaemic):ti,ab,kw
19. (((glycaemic or glycemic) adj control) or glucose control):ti,ab,kw
20. (blood glucose):ti,ab,kw
21. #15 or #16 or #17 or #18 or #19 or #20
22. #14 and #21

**Scopus**

TITLE-ABS-KEY ( ( ( ( infant*  OR  neonate*  OR  newborn* )  AND  ( preterm  OR  premature  OR  "low birth weight"  OR  "low birthweight"  OR  vlbw  OR  elbw ) )  AND  ( hyperglycemia  OR  hyperglycemic  OR  hyperglycaemia  OR  hyperglycaemic  OR  ( ( glycaemic  OR  glycemic )  W/1  control )  OR  "glucose control"  OR  "blood glucose" ) ) )

**CINAHL (via EBSCOhost)**

S2 ( hyperglycemia OR hyperglycemic OR hyperglycaemia OR hyperglycaemic OR ( ( glycaemic OR glycemic ) N1 control ) OR "glucose control" OR "blood glucose" )

S1 ( ( infant* OR neonate* OR newborn* ) ) AND ( ( preterm OR premature OR "low birth weight" OR "low birthweight" OR vlbw OR elbw ) )
